# Supplementary material for: Low-frequency Raman optical activity provides insight into the structure of chiral liquids
Source: Royal Society of Chemistry journal article supplement (doi:10.1039/d2cp02290g), 2022-01-01
Supplement: d2cp02290g1.pdf [file d2cp02290g1.pdf]

*Supporting Information*

**Low-frequency Raman Optical Activity Provides Insight into Structure of Chiral Liquids**

**Pavel Michal, Josef Kapitán, Jiří Kessler and Petr Bouř**

**Contents**

[Figure S1](#). Nitrile Raman and ROA intensities simulated with three basis sets.

[Figure S2](#). Nitrile Raman and ROA spectra calculated with two functionals.

[Figure S3](#). Conformer energies of **III-V**.

[Figure S4](#). Experimental ROA spectra for **I-VI**.

[Figure S5](#). Experimental CID ratios.

[Figure S6](#). Simulated Raman and ROA spectra, whole range.

[Figure S7](#). Calculated nitrile spectra with dimer, trimer and tetramer force fields.

[Figure S8](#). Calculated nitrile spectra, dependence on elementary cell size.

[Figure S9](#). Vibrational potential energies for **III-V**.

[Table S1](#). Laser powers and measurement times.

[Table S2](#). Cells dimensions and densities for MD.

[Table S3](#). Low-frequency fundamental modes in **III-V**.

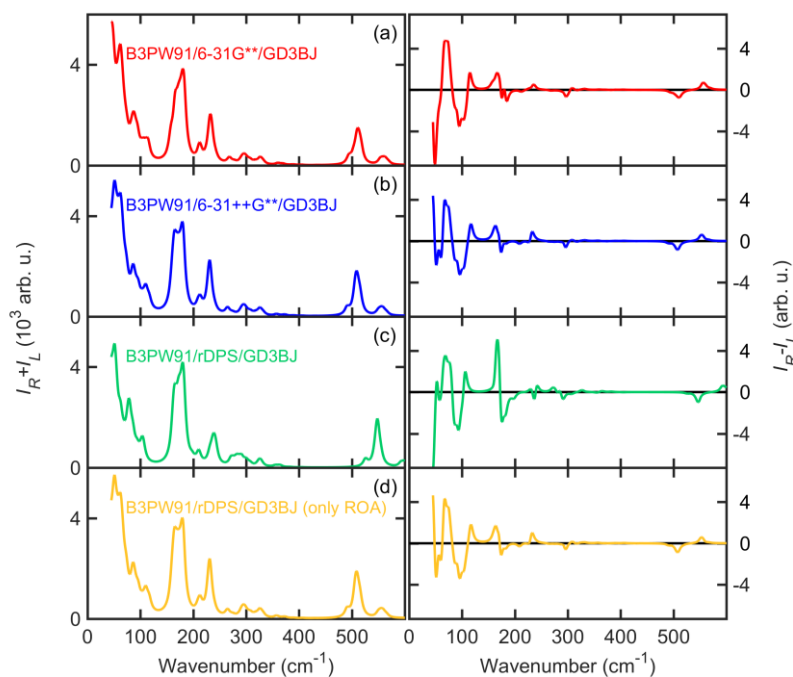

**Figure S1.** Raman and ROA spectra simulated for one snapshot of nitrile and three basis sets. For rDPS (d) the frequencies were calculated at the B3PW91/6-31++G\*\*/COSMO(ACN)/GD3BJ level.

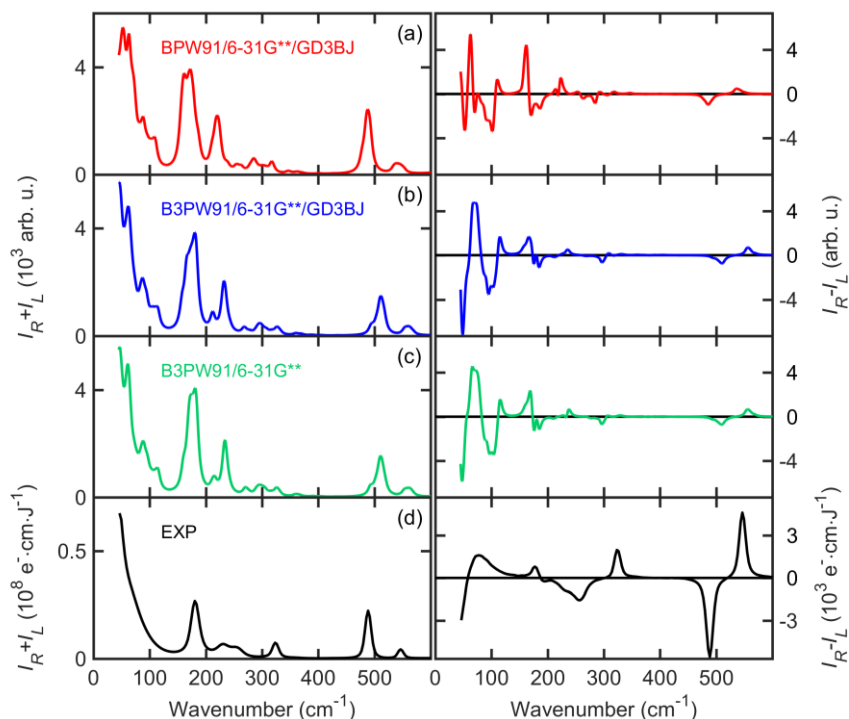

**Figure S2.** Nitrile Raman and ROA spectra calculated with the B3PW91 and BPW91 functionals, for B3PW91 with and without the GD3BJ dispersion correction, for the 6-31G\*\* basis set and COSMO(ACN) solvent model.

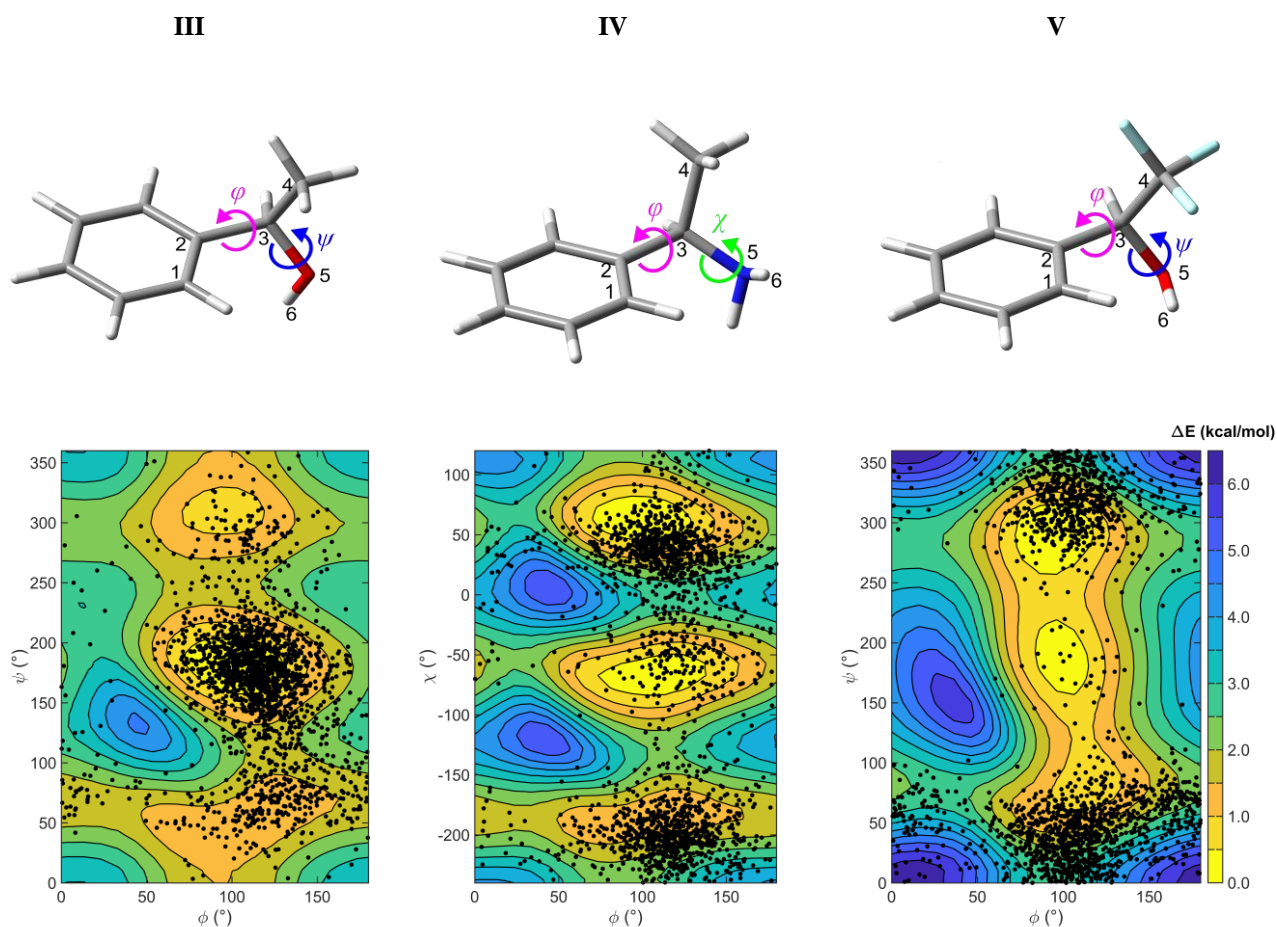

**Figure S3.** Dependencies of the electronic energy on selected torsion angles calculated at the B3PW91/6-311++G\*\*/COSMO(benzylalcohol) level (contour map) and coordinates from 200 MD snapshots (black dots). The describe phenyl rotation,  $\phi = \text{C1-C2-C3-C4}$ , hydroxyl rotation,  $\psi = \text{C4-C3-O5-H6}$ , and amine rotation,  $\chi = \text{C2-C3-N5-H6}$ .

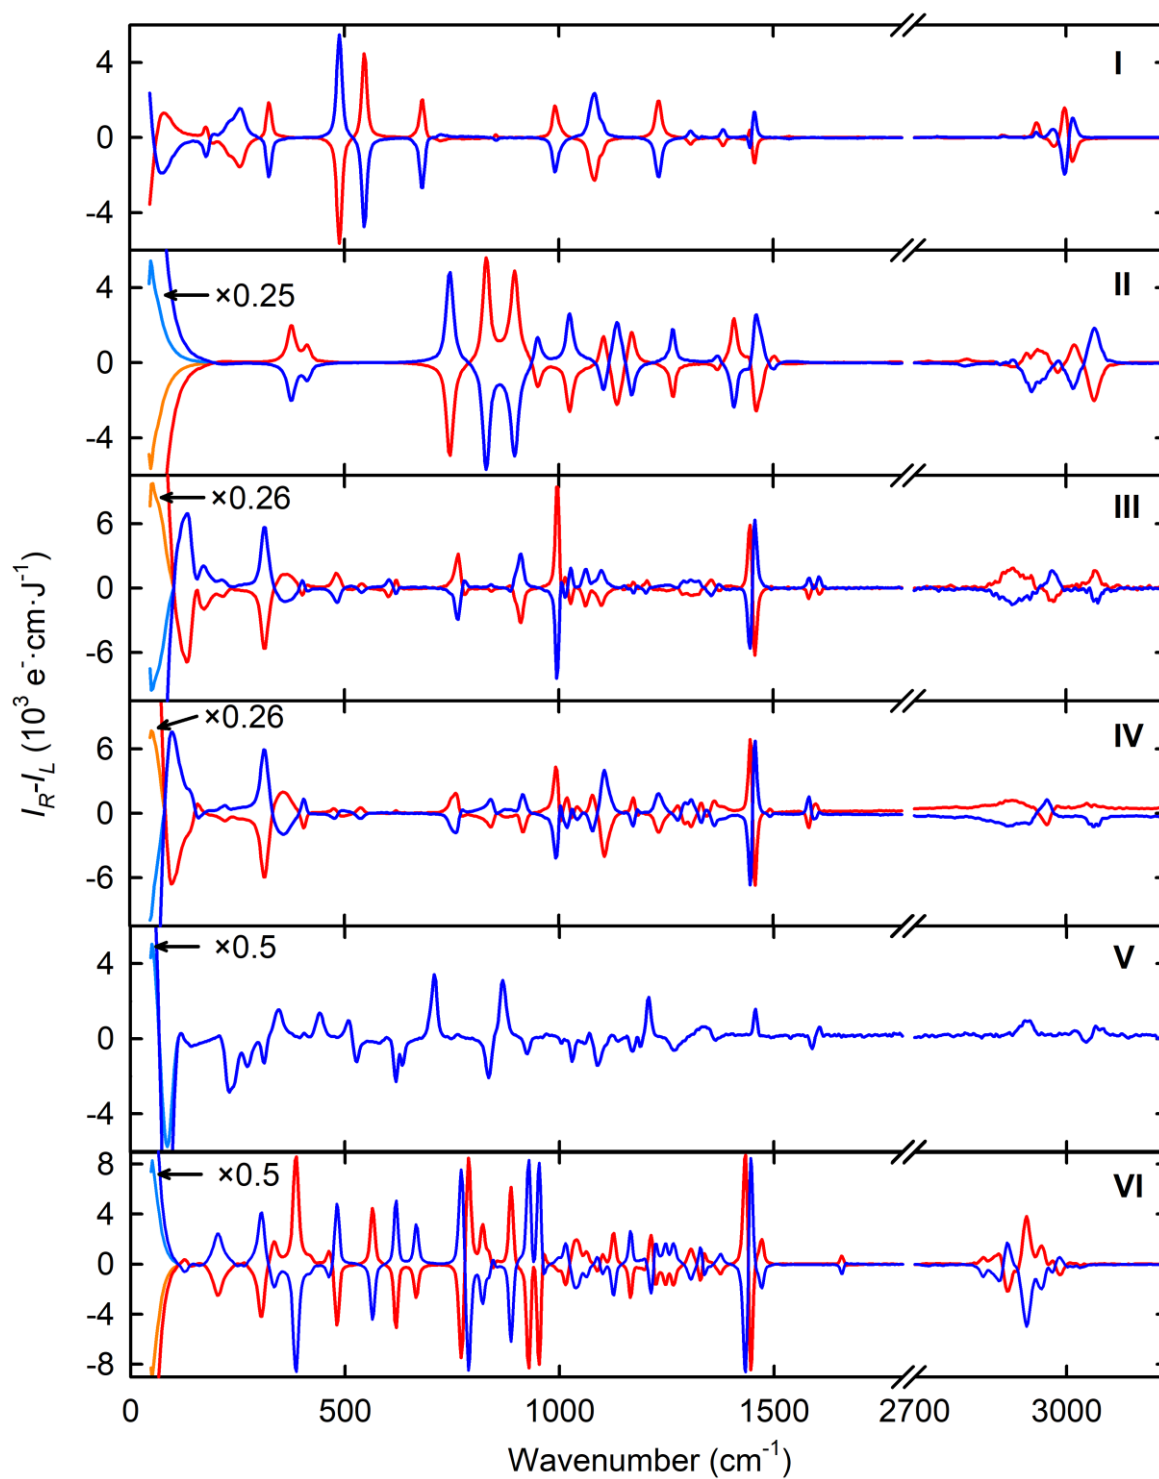

**Figure S4.** Experimental ROA spectra of the neat liquids, **I** 2-chloropropionitrile, **II** methyloxirane, **III** 1-phenylethanol, **IV**  $\alpha$ -methylbenzylamine, **V**  $\alpha$ -(trifluoromethyl)benzyl alcohol, and **VI**  $\alpha$ -pinene. *R* and *S*-enantiomers are marked in red and blue, respectively.

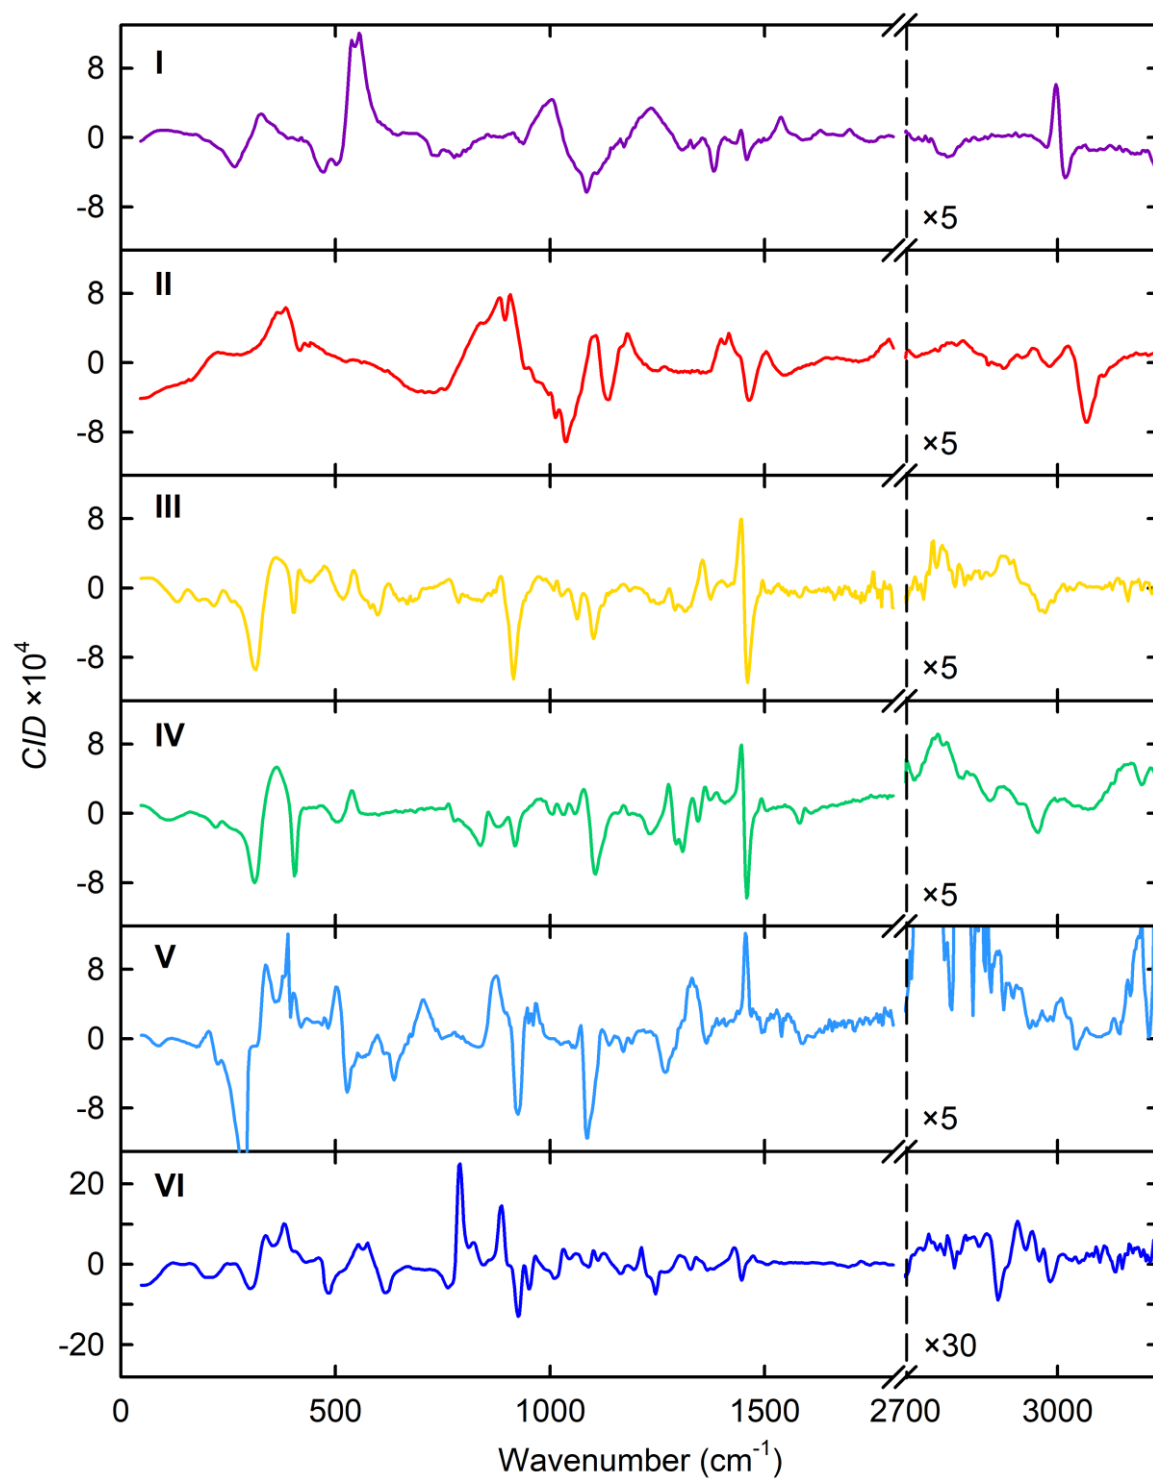

**Figure S5.** Experimental CID (ROA/Raman) ratios of **I** (*R*)-2-chloropropionitrile, **II** (*R*)-(+)-propylene oxide, **III** (*R*)-(+)-1-phenylethanol, **IV** (*R*)-(+)- $\alpha$ -methylbenzylamine, **V** (*S*)-(+)- $\alpha$ -(trifluoromethyl)benzyl alcohol, and **VI** (+)(1*R*,5*R*)- $\alpha$ -pinene.

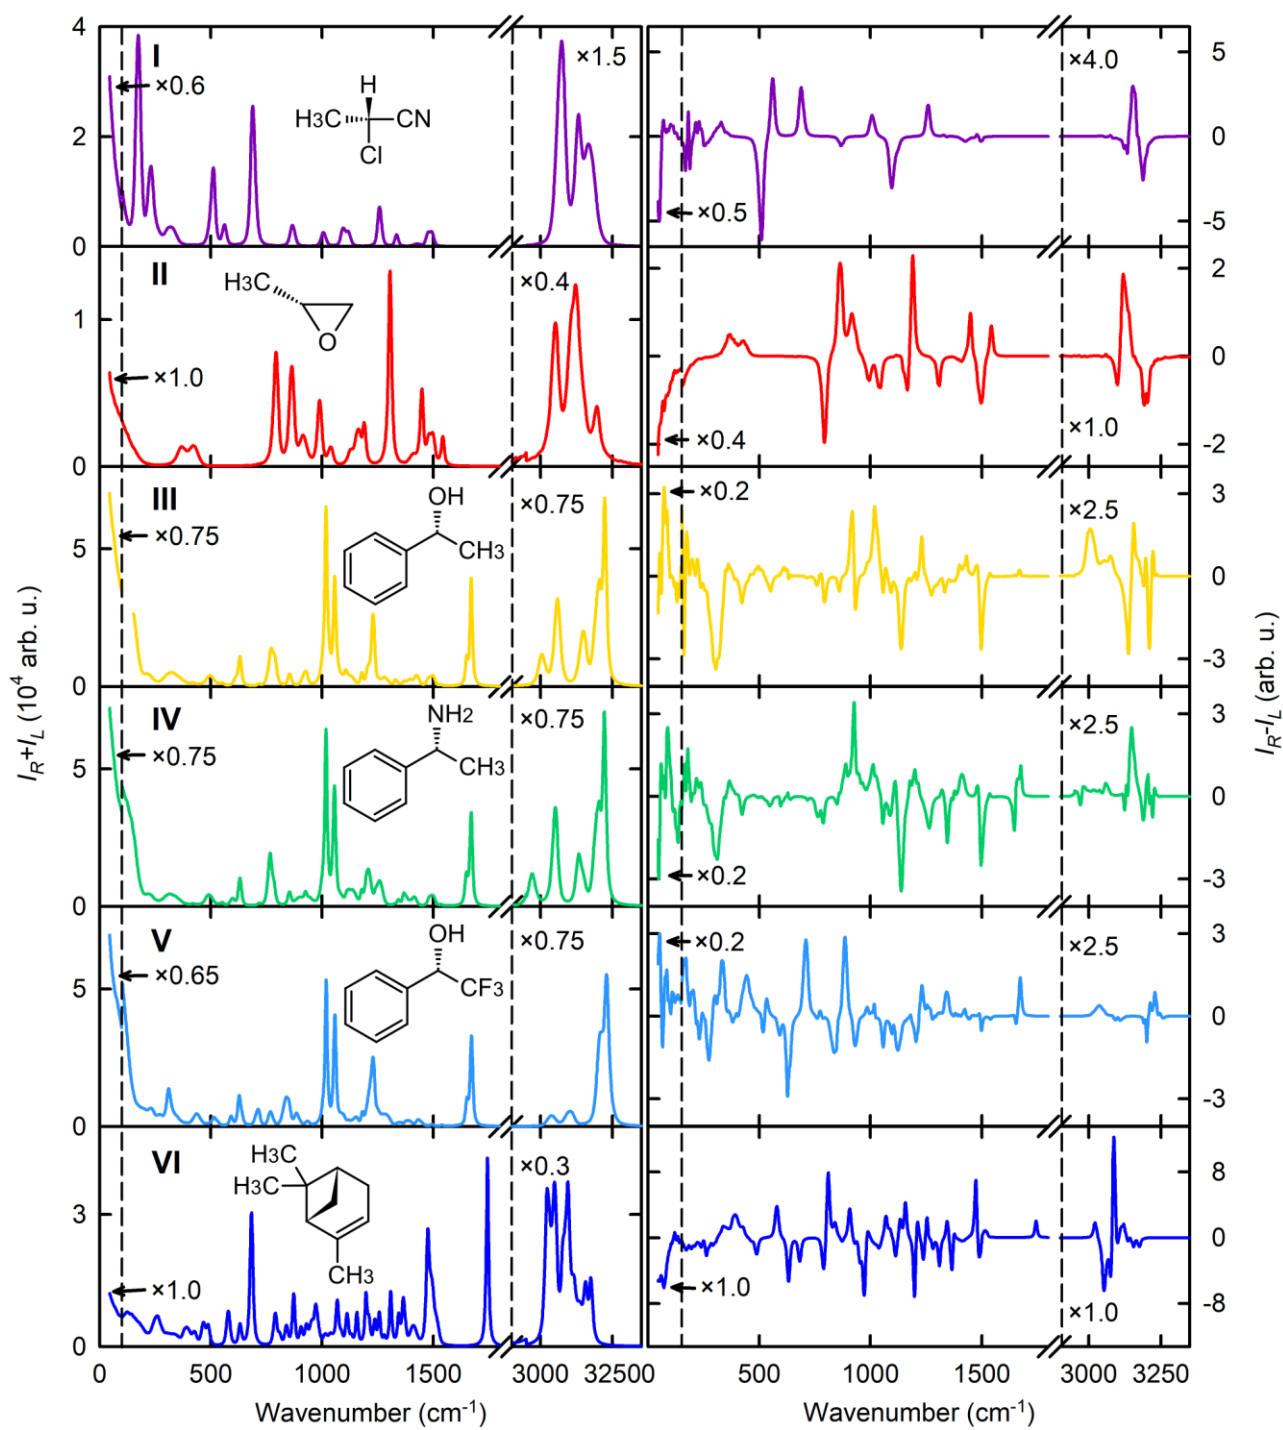

**Figure S6.** Raman and ROA spectra of I-VI simulated in the whole range, the crystal model.

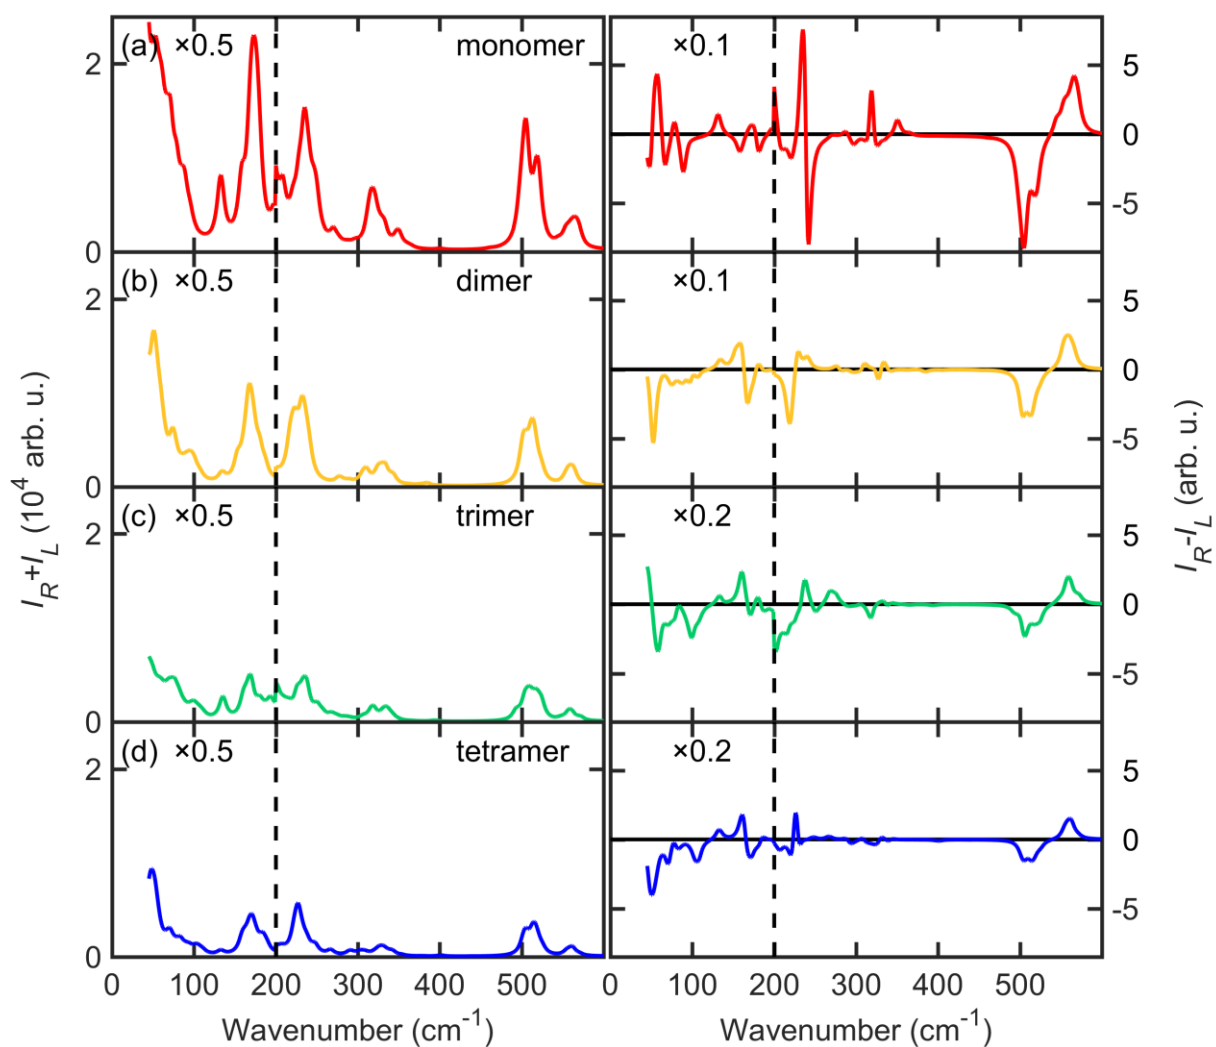

**Figure S7.** Raman and ROA spectra of one nitrile MD snapshot (10 molecules in the elementary cell) simulated from force field constructed from monomers, dimers, trimers and tetramers.

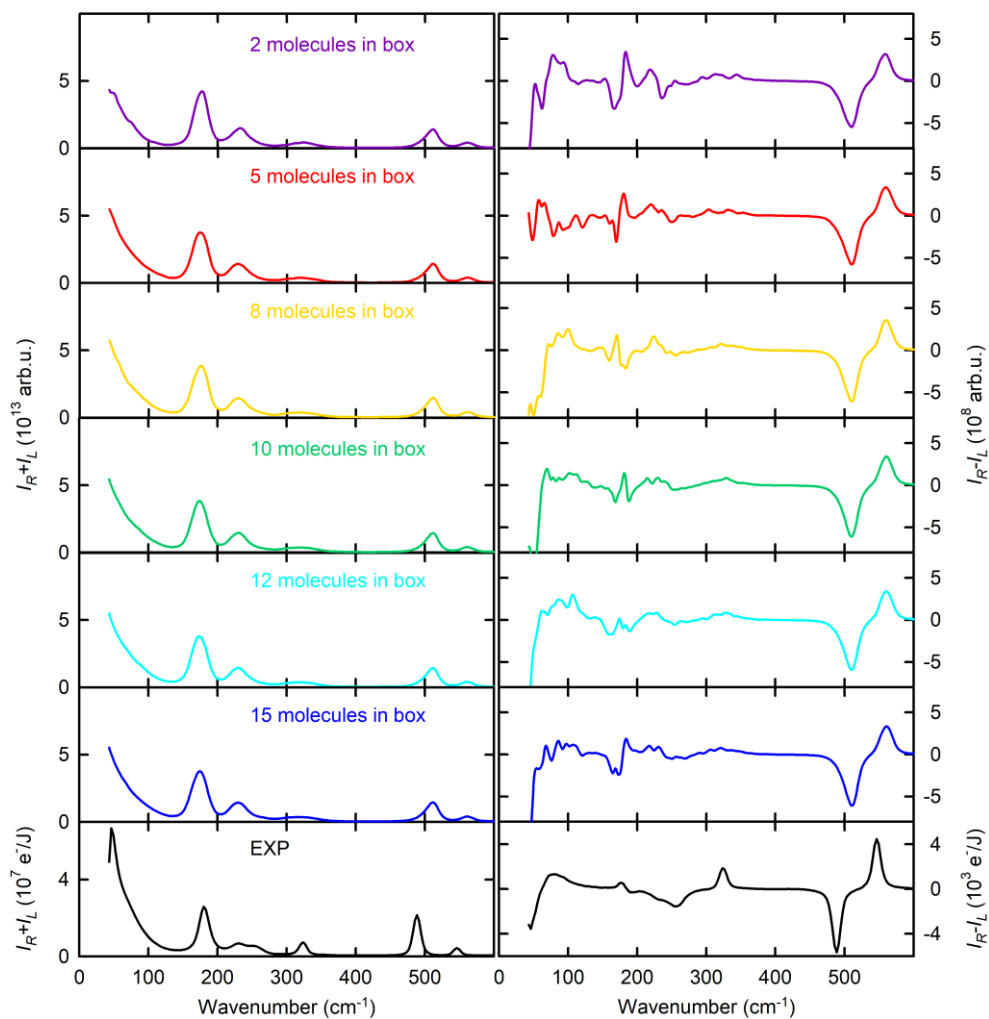

**Figure S8.** Calculated Raman and ROA nitrile spectra, using elementary cells containing 2, 5, 8, 10, 12 and 15 molecules, for 200 snapshots.



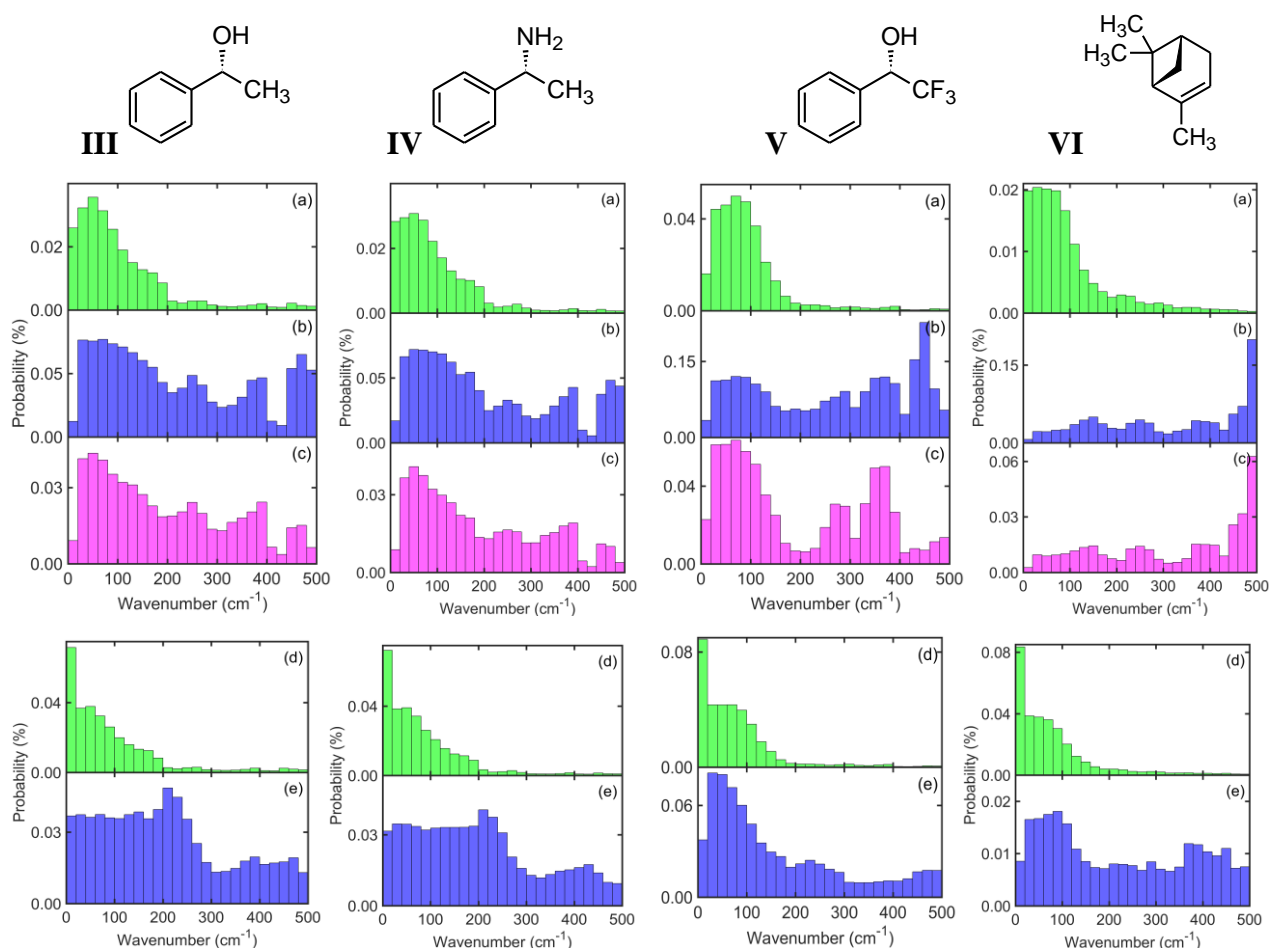

**Figure S9.** Relative vibrational potential energy distribution (PED) of intermolecular motions related to two (stretching (a), bending (b), torsion (c)) and one (translations (d), rotations (e)) molecule, for **III-V**.

**PEDs of individual coordinates were calculated by the following procedure.**

1) Transformation matrix **B** was defined, relating internal ( $I_i$ ) and Cartesian ( $r_\lambda$ ) coordinates,

$$I_i = \sum_{\lambda} B_{\lambda i} r_{\lambda} . \text{ Using } \mathbf{B}, \text{ force field elements } f_{ij} \text{ in the internal coordinates were calculated.}$$

2) Within the harmonic approximation, Cartesian force field was normalized, so that the **S** matrix relating Cartesian and normal mode ( $Q_J$ ) coordinates was obtained,  $Q_J = \sum_{\lambda} S_{\lambda J} r_{\lambda}$

3) Relative energy contribution of coordinate  $I_i$  in mode  $J$  was calculated as

$$PED_{ji} = \frac{A_{ji}}{\sum_i A_{ji}} \times 100\% , \text{ where } A_{ji} = b_{ji}^2 f_{ii} \omega_J^{-1} , b_{ji} = \sum_{\lambda} S_{\lambda J} B_{\lambda i} \sqrt{m_{\lambda}} , \omega_J \text{ is the normal mode frequency, } m_{\lambda} \text{ is atomic mass. In the graphs, PED values were averaged over the snapshots and normal modes in a wavenumber interval.}$$

**Table S1** Laser powers at the sample  $P$  and total accumulation times  $t$  used in ROA measurements.

| Compound                   | Enantiomer  | $P$ (mW) | $t$ (h) |
|----------------------------|-------------|----------|---------|
| <b>I</b> nitrile           | $R$         | 83       | 9.7     |
|                            | $S$         | 83       | 13.2    |
| <b>II</b> methyloxirane    | $R$         | 540      | 34.6    |
|                            | $R$ @ water | 338      | 5.5     |
|                            | $S$         | 540      | 19.3    |
| <b>III</b> phenylethanol   | $R$         | 86       | 1.9     |
|                            | $S$         | 82       | 2.9     |
| <b>IV</b> benzylamine      | $R$         | 69       | 7.8     |
|                            | $S$         | 69       | 8.5     |
| <b>V</b> 3F-benzyl         | $S$         | 114      | 11.4    |
|                            | $R$         | 266      | 5.5     |
| <b>VI</b> $\alpha$ -pinene | $S$         | 266      | 5.5     |

**Table S2.** Dimensions of the elementary cells (10 molecules in the box) and densities used in the calculations

|            | Liquid           | Box size (Å) | $\rho$ (g/ml) | COSMO Solvent   |
|------------|------------------|--------------|---------------|-----------------|
| <b>I</b>   | nitrile          | 11.37        | 1.012         | acetonitrile    |
| <b>II</b>  | methyloxirane    | 10.39        | 0.859         | tetrahydrofuran |
| <b>III</b> | phenylethanol    | 12.61        | 1.012         | benzylalcohol   |
| <b>IV</b>  | benzylamine      | 12.89        | 0.940         | benzylalcohol   |
| <b>V</b>   | 3F-benzyl        | 13.13        | 1.293         | benzylalcohol   |
| <b>VI</b>  | $\alpha$ -pinene | 13.82        | 0.858         | cyclohexane     |

**Table S3.** Selected low-frequency fundamental modes in **III-V**.

| <b><math>\nu</math> / cm<sup>-1</sup></b> | <b>modes</b>                          |
|-------------------------------------------|---------------------------------------|
| <b>III:</b>                               |                                       |
| 36                                        | Phe rotation                          |
| 128                                       | Me and Phe wagging                    |
| 212                                       | Me and Phe scissoring                 |
| 266                                       | Me and OH rotation                    |
| 283                                       | Me and OH rotation                    |
| 305                                       | deloc. def.                           |
| 372                                       | deloc. def.                           |
| 411                                       | Phe out of plane                      |
| 482                                       | deloc. def.                           |
| <b>IV:</b>                                |                                       |
| 29                                        | Phe rotation                          |
| 129                                       | Me and Phe wagging                    |
| 214                                       | Me and Phe scissoring                 |
| 268                                       | Me rotation                           |
| 303                                       | deloc. def., NH <sub>2</sub> rotation |
| 360                                       | deloc. def.                           |
| 411                                       | Phe out of plane                      |
| 480                                       | NH <sub>2</sub> and Me wagging        |
| <b>V:</b>                                 |                                       |
| 27                                        | Phe rotation                          |
| 64                                        | CF <sub>3</sub> rotation, Phe wagging |
| 99                                        | deloc. def.                           |
| 199                                       | OH rotation                           |
| 233                                       | deloc. def.                           |
| 290                                       | deloc. def.                           |
| 308                                       | deloc. def.                           |
| 335                                       | deloc. def.                           |
| 412                                       | Phe out of plane                      |
| 428                                       | deloc. def.                           |
